# Supplementary material for: Shape-controlled cobalt phosphide nanoparticles as volatile organic solvent sensor
Source: Royal Society of Chemistry journal article supplement (doi:10.1039/c6tc00949b), 2016-01-01
Supplement: c6tc00949b1.pdf [file c6tc00949b1.pdf]

## Supporting Information

### Shape-controlled Cobalt Phosphide Nanoparticles as Volatile Organic Solvent Sensor

Bapi Pradhan<sup>†</sup>, Gundam Sandeep Kumar<sup>†</sup>, Amit Dalui<sup>†</sup>, Ali Hossain Khan<sup>†</sup>, Biswarup Satpati<sup>‡</sup>, Qingmin Ji<sup>§</sup>, Lok Kumar Shrestha<sup>§</sup>, Katsuhiko Ariga<sup>§</sup> and Somobrata Acharya<sup>\*†</sup>

<sup>†</sup>Centre for Advanced Materials, Indian Association for the Cultivation of Science, Jadavpur, Kolkata 700032, India; <sup>‡</sup>Surface Physics and Material Science Division, Saha Institute of Nuclear Physics, 1/AF Bidhannagar, Kolkata 700064, India; <sup>§</sup>World Premier International Center for Materials Nanoarchitectonics (WPI-MANA), National Institute for Materials Science (NIMS) 1-1 Namiki, Tsukuba, Ibaraki 305-0044

\*Corresponding author E-mail: [camsa2@iacs.res.in](mailto:camsa2@iacs.res.in)

### Contents:

|                                                                                   |            |
|-----------------------------------------------------------------------------------|------------|
| 1. SEM images of cobalt phosphide NRs.....                                        | Figure S1  |
| 2. EDX data of cobalt phosphide NRs.....                                          | Figure S2  |
| 3. EFTEM mapping of cobalt phosphide NRs.....                                     | Figure S3  |
| 4. Absorption spectra of cobalt phosphide NRs.....                                | Figure S4  |
| 5. XPS spectrum of cobalt phosphide NRs.....                                      | Figure S5  |
| 6. Absorption spectra of cobalt phosphide NPs with annealing time variation.....  | Figure S6  |
| 7. EDX data comparison of cobalt phosphide NRs with annealing time variation..... | Figure S7  |
| 8. XRD comparison of cobalt phosphide NRs with different annealing time.....      | Figure S8  |
| 9. EDX data comparison of various cobalt phosphide NPs formed after 300 min.....  | Figure S9  |
| 10. XRD comparison of various cobalt phosphide NPs formed after 300 min.....      | Figure S10 |
| 11. Solid state RAMAN of different morphological cobalt phosphide NPs.....        | Figure S11 |
| 12. EFTEM mapping of hollow cobalt phosphide NPs.....                             | Figure S12 |
| 13. QCM frequency shifts of hollow and NRs cobalt phosphide NPs.....              | Figure S13 |

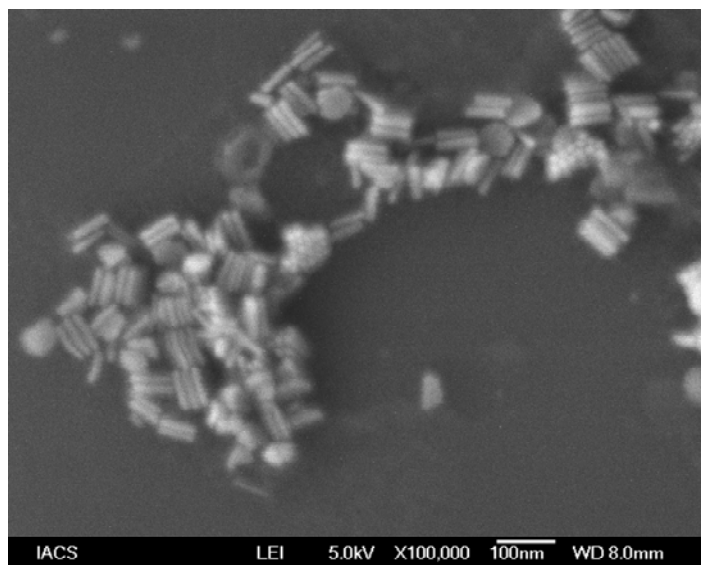

**Figure S1.** SEM images of high aspect ratio cobalt phosphide NRs synthesized at 300 °C after 300 min of annealing time.

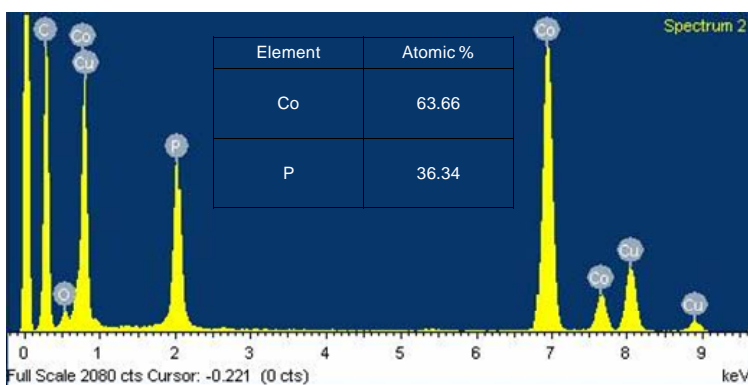

**Figure S2.** EDX spectrum of high aspect ratio cobalt phosphide NRs formed after 300 min of reaction annealing time at 300 °C revealing the presence of Co and P. Atomic percentage of Co and P is listed in the inset table. The EDX was collected from a broad sample area.

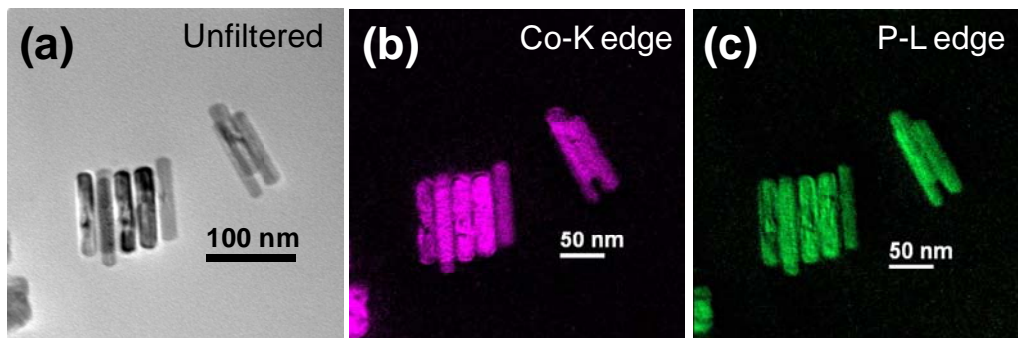

**Figure S3.** (a) Unfiltered TEM of high aspect ratio cobalt phosphide NRs. (b-c) EFTEM mapping of hollow cobalt phosphide NRs using Co-K and and P-L energies formed after 300

min of reaction annealing time at 300 °C revealing the presence of Co and P throughout the NRs.

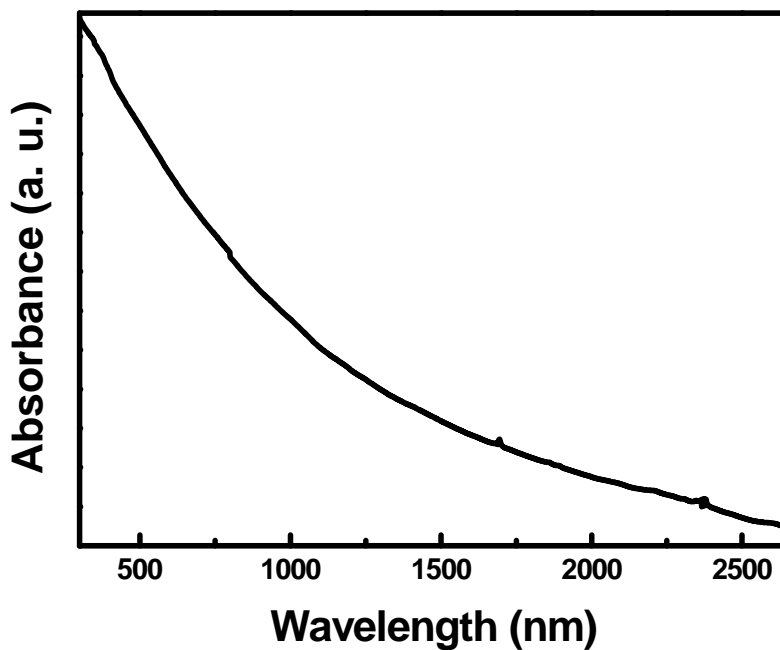

**Figure S4.** UV-Vis-NIR absorption spectra of high aspect ratio cobalt phosphide NRs formed after 300 min of annealing time at 300 °C in TCE solvent.

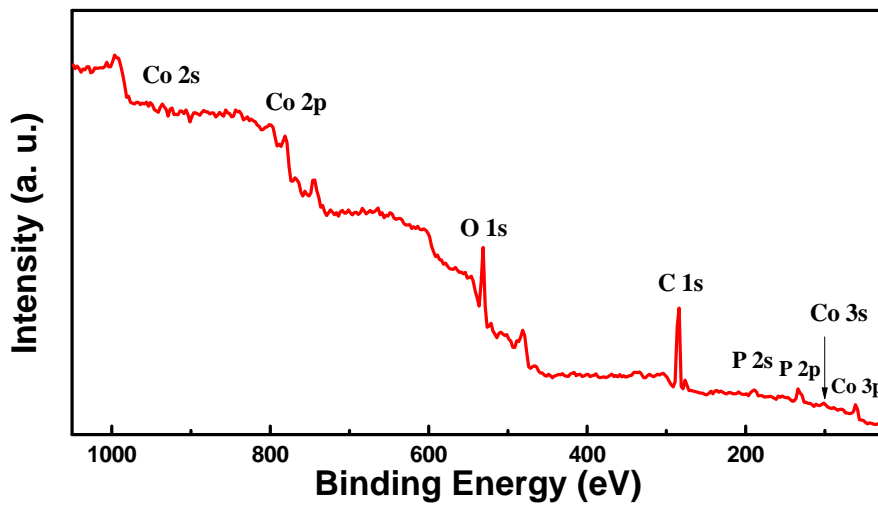

**Figure S5.** XPS spectrum of high aspect ratio cobalt phosphide NRs formed after 300 min of annealing time at 300 °C.

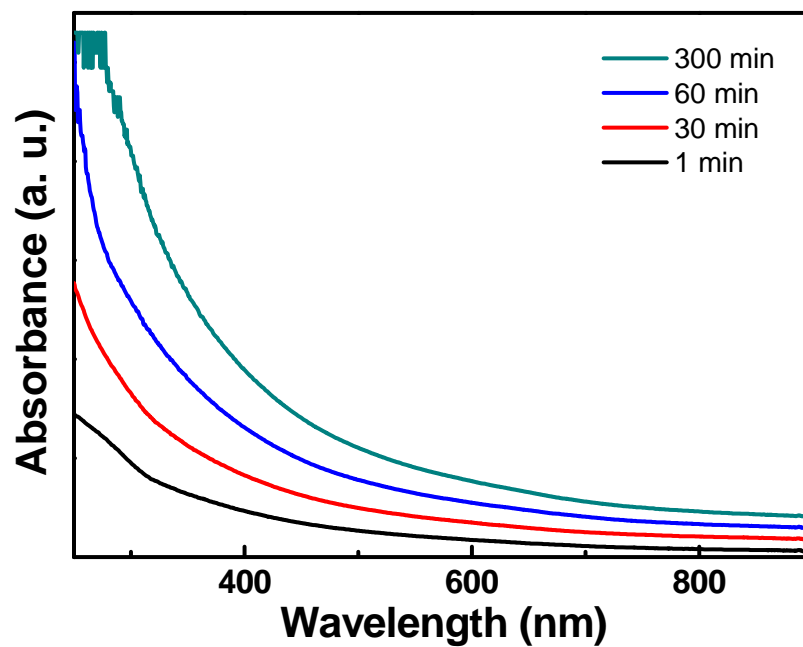

**Figure S6.** UV-Vis absorption spectra comparison of cobalt phosphide NPs formed at 300 °C with different reaction annealing time. There is no change of absorption nature with increasing annealing time of reaction.

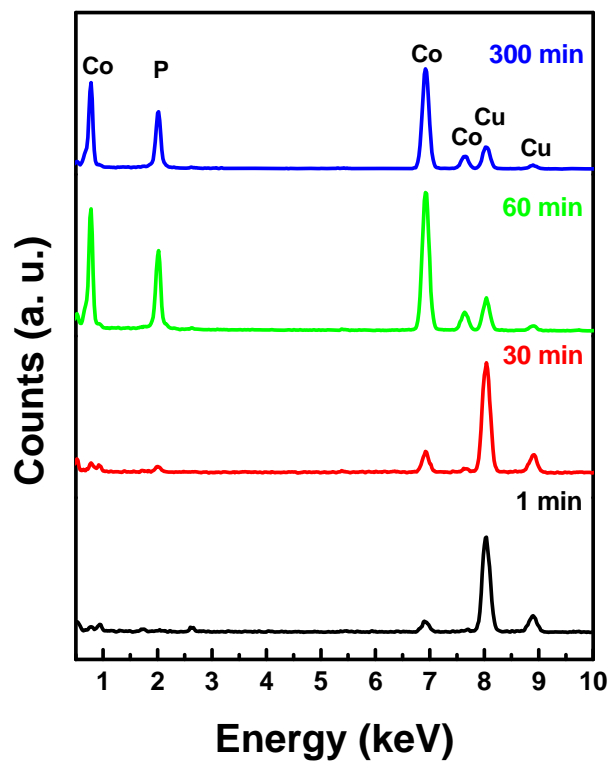

**Figure S7.** EDX data comparison of cobalt phosphide NPs formed at 300 °C with reaction annealing time variation. EDX data of reaction products formed after 1 min, 30 min, 60 min and 300 min of annealing time is compared here.

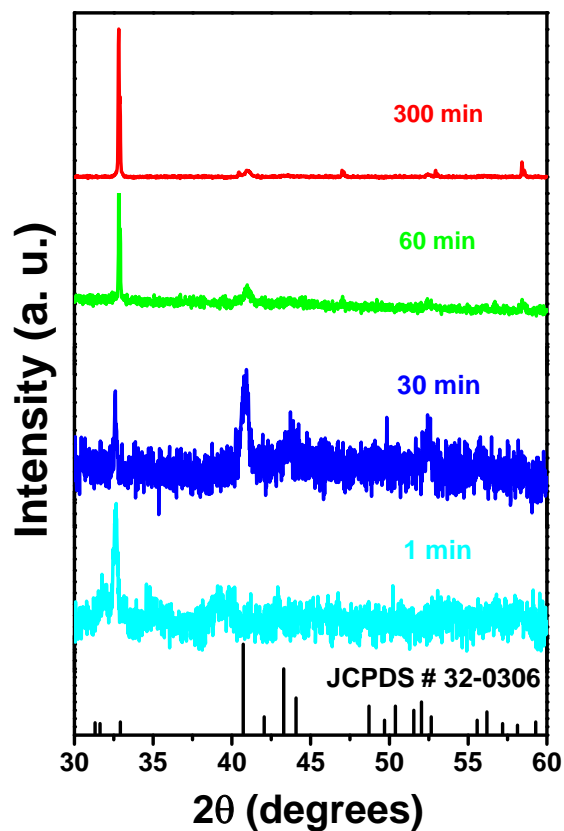

**Figure S8.** XRD data comparison of cobalt phosphide NPs formed at 300 °C with different reaction annealing time. XRD data of particles formed after 1 min, 30 min, 60 min and 300 min of reaction annealing time is compared here.

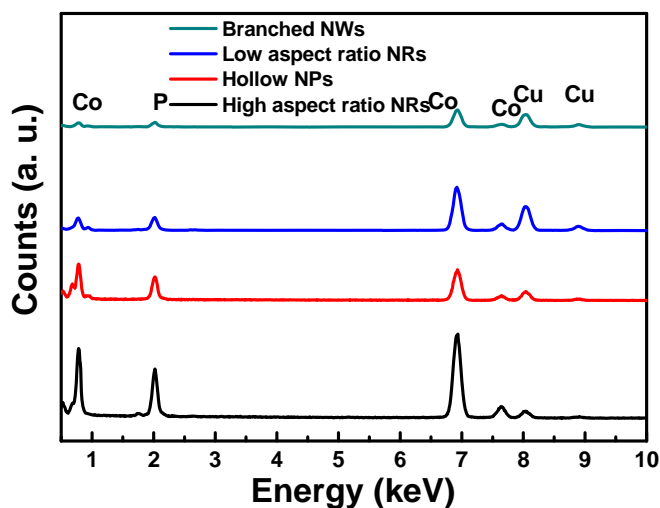

**Figure S9.** EDX data comparison of different morphological cobalt phosphide NPs formed after 300 min of annealing time at 300 °C. EDX data of cobalt phosphide NPs of high aspect ratio NRs, low aspect ratio NRs, hollow NPs and branched NWs are compared here.

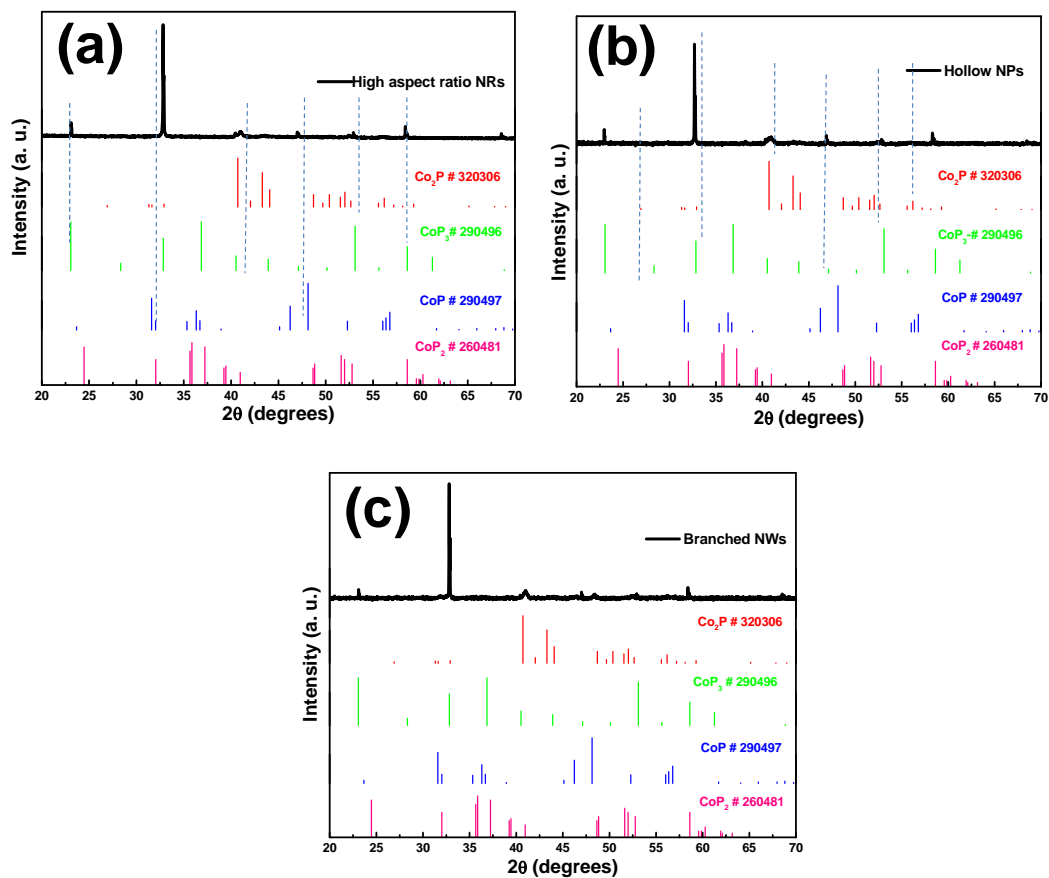

**Figure S10.** Comparison of standard and experimental XRD pattern of as synthesized different shaped cobalt phosphide NPs. (a) high aspect ratio NRs (b) branched NWs and (c) hollow cobalt phosphide NPs.

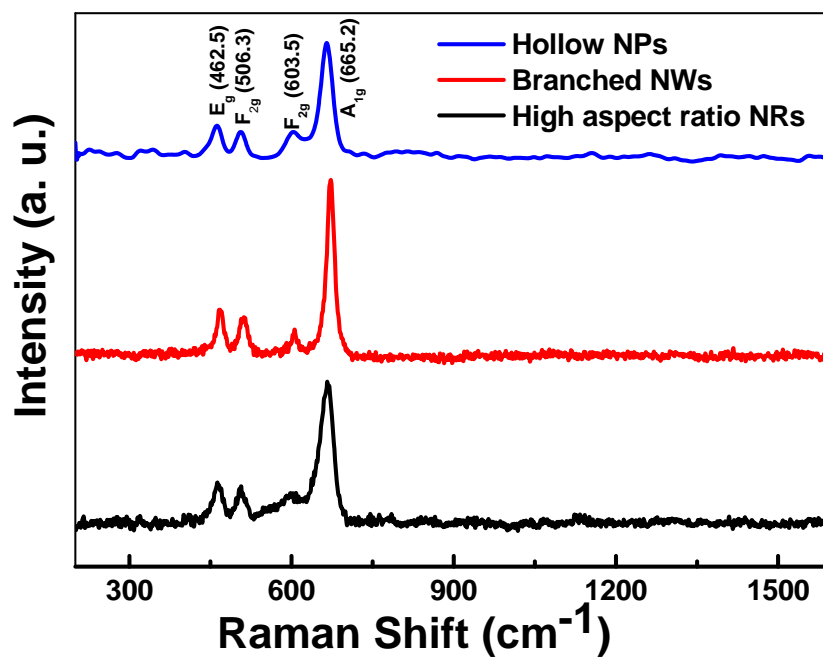

**Figure S11.** Solid state RAMAN spectra of different morphological cobalt phosphide NPs formed after 300 min of reaction annealing time at 300 °C.

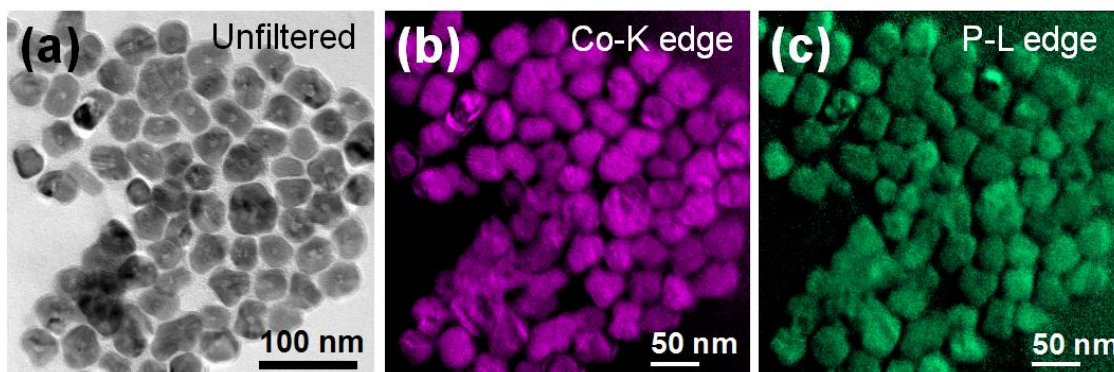

**Figure S12.** (a) Unfiltered TEM of hollow cobalt phosphide NPs. (b-c) EFTEM mapping of hollow cobalt phosphide NPs Co-K and P-L energies formed after 300 min of reaction annealing time at 300 °C revealing the presence of Co and P throughout the NPs.

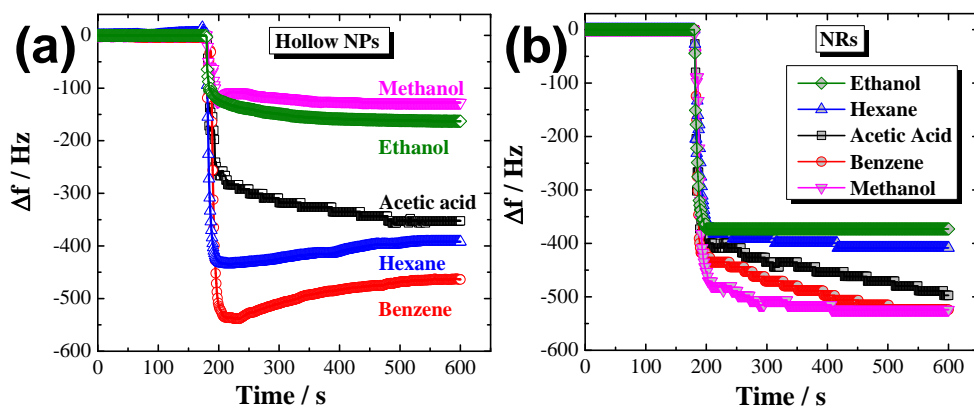

**Figure S13.** QCM frequency shifts of (a) cobalt phosphide hollow NPs and (b) high aspect ratio cobalt phosphide NRs upon exposure of different solvent vapors (methanol, ethanol, hexane, acetic acid and benzene).
